# Supplementary material for: Assessing the impact of COVID-19 measures on COPD management and patients: a simulation-based decision support tool for COPD services in the UK
Source: HighWire-hosted journal article supplement (doi:10.1136/bmjopen-2022-062305), 2022-10-01
Supplement: bmjopen-2022-062305supp001_data_supplement.pdf [file bmjopen-2022-062305supp001_data_supplement.pdf]

## Supplementary File

Table S1 Key Input Parameters of the Model

| Input Parameter                                                                           | Estimate                                                                                                                                                                           |
|-------------------------------------------------------------------------------------------|------------------------------------------------------------------------------------------------------------------------------------------------------------------------------------|
| <b>DEMAND</b>                                                                             |                                                                                                                                                                                    |
| Number of COPD exacerbation related arrivals to inpatient department                      | <b>The Admission Model</b><br>(i.e., Eq.1 presented in the manuscript)                                                                                                             |
| Number of new COPD patients seen in COPD service (weekly)                                 | Uniform (6-9)                                                                                                                                                                      |
| Number of existing COPD patients (for Follow-up appointment) seen in the service (weekly) | Uniform (16-22)                                                                                                                                                                    |
| Percentage of new patients having a first appointment in each clinic                      | <b>COPD:</b> 32%<br><b>General:</b> 46%<br><b>NIV:</b> 13%<br><b>Alpha-1:</b> 4%<br><b>Advanced:</b> 5%                                                                            |
| Percentage of existing patients having a FU Appointment in each clinic                    | <b>COPD:</b> 13%<br><b>General:</b> 66%<br><b>NIV:</b> 11%<br><b>Alpha-1:</b> 8%<br><b>Advanced:</b> 1%                                                                            |
| Percentage of patients falling into each gender                                           | <b>Male:</b> 52%<br><b>Female:</b> 48%                                                                                                                                             |
| Percentage of patients falling into each age group                                        | <b>25-44 years old:</b> 5%<br><b>45-54 years old:</b> 10%<br><b>55-64 years old:</b> 30%<br><b>65-74 years old:</b> 40%<br><b>75-84 years old:</b> 10%<br><b>85+ years old:</b> 5% |
| Percentage of patients falling into each disease severity                                 | Mild: 10%<br>Moderate: 40%<br>Severe: 29%<br>Very Severe: 21%                                                                                                                      |
| The capacity level for each clinic                                                        | <b>COPD:</b> Usual<br><b>General:</b> Usual<br><b>NIV:</b> Usual<br><b>Alpha-1:</b> Usual<br><b>Advanced:</b> Usual                                                                |
| <b>OUTPATIENT DEPARTMENT</b>                                                              |                                                                                                                                                                                    |
| Frequency of Clinic days                                                                  | <b>COPD:</b> Once a week<br><b>General:</b> Once a week<br><b>NIV:</b> Once a week<br><b>Alpha-1:</b> Twice a week<br><b>Advanced:</b> Once a month                                |
| Attendance rate in each clinic                                                            | <b>COPD:</b> 75%<br><b>General:</b> 85%<br><b>NIV:</b> 85%<br><b>Alpha-1:</b> 95%<br><b>Advanced:</b> 95%                                                                          |
| Appointment types for clinic visits, i.e., face to face or remote                         | <b>See Table S2</b>                                                                                                                                                                |
| Required mix of resources for Reception                                                   | <b>F2F:</b> A clerk and a desk<br><b>Remote:</b> none                                                                                                                              |
| Required mix of resources for Observation                                                 | <b>F2F:</b> An HCA and a room<br><b>Remote:</b> none                                                                                                                               |
| Required mix of resources for COPD and General Clinics                                    | A consultant, an HCA, and a room                                                                                                                                                   |

|                                                                                                                            |                                                                                                                                                          |
|----------------------------------------------------------------------------------------------------------------------------|----------------------------------------------------------------------------------------------------------------------------------------------------------|
| Required mix of resources for NIV Clinic                                                                                   | A consultant, an SV practitioner, an HCA, and a room                                                                                                     |
| Required mix of resources for Alpha-1 Clinic                                                                               | Two consultants, a HCA, a room, a scanner                                                                                                                |
| Required mix of resources for Advanced Clinic                                                                              | Two consultants, and an MDT, a room                                                                                                                      |
| Time spent in Reception per patient by appointment type (per patient)                                                      | <b>F2F:</b> Uniform (2-5 minutes)<br><b>Remote:</b> 0                                                                                                    |
| Observation time in Observation room per patient by appointment type                                                       | <b>F2F:</b> Uniform (10-15 minutes)<br><b>Remote:</b> 0                                                                                                  |
| Time spent in COPD Clinic and General Clinic (per patient)                                                                 | <b>FA:</b> Uniform (30-45 minutes)<br><b>FU:</b> 15 minutes                                                                                              |
| Time spent in NIV Clinic and Alpha-1 Clinic (per patient)                                                                  | <b>FA:</b> Uniform (30-45 minutes)<br><b>FU:</b> 20 minutes                                                                                              |
| Time spent in Advanced Clinic for First and FU appointments (per patient)                                                  | <b>FA:</b> 60 minutes<br><b>FU:</b> 20 minutes                                                                                                           |
| Percentage of patients given a FU appointment in each clinic                                                               | <b>COPD:</b> 82%<br><b>General:</b> 100%<br><b>NIV:</b> 80%<br><b>Alpha-1:</b> 95%<br><b>Advanced:</b> 45%                                               |
| Waiting time for the next FU appointment (i.e., when the patient will come back)                                           | <b>COPD:</b> 6 months<br><b>General:</b> 6 months<br><b>NIV:</b> 6 months<br><b>Alpha-1:</b> 6 months<br><b>Advanced:</b> 12 months                      |
| The quality of a clinic visit as a face to face appointment                                                                | <b>Worse than a usual appointment:</b> 10%<br><b>Same as a usual appointment:</b> 70%<br><b>Better than a usual appointment:</b> 20%                     |
| The quality of a clinic visit as a remote appointment                                                                      | <b>Worse than a usual appointment:</b> 68.8%<br><b>Same as a usual appointment:</b> 14.3%<br><b>Better than a usual appointment:</b> 17.1%               |
| <b>OUTPATIENT SERVICES</b>                                                                                                 |                                                                                                                                                          |
| Percentage of patients referred to Physiotherapy and Pulmonary Rehabilitation                                              | <b>Physiotherapy:</b> 15%<br><b>PR:</b> 5%                                                                                                               |
| Percentage of patients referred to LF testing                                                                              | <b>Benchmark:</b> Between 40-45%<br><b>Scenario 1:</b> Between 15-20%<br><b>Scenario 2:</b> Between: 8-12%<br><b>Scenario 3:</b> Between 2-4%            |
| Appointment types for Physiotherapy and Pulmonary Rehabilitation, i.e., face to face (centre-based) or remote (home-based) | <b>Benchmark:</b> 100% F2F<br><b>Scenario 1:</b> 25% F2F, 75% Remote<br><b>Scenario 2:</b> 15% F2F, 85% Remote<br><b>Scenario 3:</b> 0% F2F, 100% Remote |
| Appointment types for LF testing, i.e., face to face or remote                                                             | 100% Face to Face, 0% Remote                                                                                                                             |
| The capacity level in Physiotherapy and Pulmonary Rehabilitation                                                           | <b>Physiotherapy:</b> Usual<br><b>PR:</b> Usual                                                                                                          |
| The capacity level in LF Testing                                                                                           | <b>Benchmark:</b> 100%<br><b>Scenario 1:</b> 50-60%<br><b>Scenario 2:</b> 20-30%<br><b>Scenario 3:</b> 5-15%                                             |
| Attendance rate for each service                                                                                           | <b>LF Test:</b> 90%<br><b>Physiotherapy:</b> 80%<br><b>PR:</b> 69%                                                                                       |
| Completion rate for Pulmonary Rehabilitation                                                                               | 42%                                                                                                                                                      |
| Required mix of resources for LF Test                                                                                      | A nurse and a room                                                                                                                                       |
| Required mix of resources for Physiotherapy                                                                                | A physiotherapist and a room                                                                                                                             |

|                                                                                |                                                                                                                   |
|--------------------------------------------------------------------------------|-------------------------------------------------------------------------------------------------------------------|
| Required mix of resources for Pulmonary Rehabilitation                         | A physiotherapist, a nurse, a therapist assistant, a gym, and a classroom                                         |
| Treatment time in each service                                                 | <b>LF Test:</b> 25 minutes<br><b>Physiotherapy:</b> Uniform (50-60 minutes)<br><b>PR:</b> Uniform (60-90 minutes) |
| Pre and Post assessment time in Pulmonary Rehabilitation (per patient)         | Uniform (40-45 minutes)                                                                                           |
| Number of Pulmonary Rehabilitation sessions                                    | 16 sessions (2 sessions every week)                                                                               |
| <b>INPATIENT DEPARTMENT</b>                                                    |                                                                                                                   |
| Length of stay in inpatient department                                         | Frequency distribution (Average: 6.1 days)                                                                        |
| Percentage of discharge method, i.e., Discharged to Community or PC, and Died. | <b>Community or PC:</b> 93%<br><b>Died:</b> 7%                                                                    |
| <b>PATIENT OUTCOMES</b>                                                        |                                                                                                                   |
| QALY Gain due to PR                                                            | <b>F2F (Centre-based):</b> Uniform (0.029 – 0.032)<br><b>Remote (Home-based):</b> Uniform (0.037 – 0.040)         |
| QALY Gain due to LF testing                                                    | Uniform (0.037 – 0.040)                                                                                           |
| QALY Reduction due to exacerbation related admission                           | Uniform (0.005 – 0.006)                                                                                           |

**Notes: Unless specified, the input estimates are the same for each scenario or all visit types. COPD:** Chronic obstructive pulmonary disease, **FA:** First Attendance, **FU:** Follow-up, **F2F:** Face-to-face, **HCA:** Healthcare assistant, **LF:** Lung Function, **MDT:** Multidisciplinary Team, **NIV:** Non-Invasive Ventilation, **PC:** Primary Care, **PR:** Pulmonary Rehabilitation, **QALY:** Quality-adjusted life year, **SV:** Sleep & Ventilation.

**Table S2** The parameter values of the scenarios

| Month  | Benchmark Scenario |                          | Scenario 1 (Plan A) |                          | Scenario 2 (Plan B) |                          | Scenario 3 (Plan C) |                          |
|--------|--------------------|--------------------------|---------------------|--------------------------|---------------------|--------------------------|---------------------|--------------------------|
|        | SI                 | Appt. Type (F2F, Remote) | SI                  | Appt. Type (F2F, Remote) | SI                  | Appt. Type (F2F, Remote) | SI                  | Appt. Type (F2F, Remote) |
| Jan-22 | 0                  | 100%, 0%                 | 25                  | 60%, 40%                 | 40                  | 40%, 60%                 | 60                  | 60%, 20%                 |
| Feb-22 | 0                  | 100%, 0%                 | 23                  | 60%, 40%                 | 40                  | 40%, 60%                 | 60                  | 60%, 30%                 |
| Mar-22 | 0                  | 100%, 0%                 | 23                  | 70%, 30%                 | 40                  | 50%, 50%                 | 50                  | 50%, 40%                 |
| Apr-22 | 0                  | 100%, 0%                 | 23                  | 70%, 30%                 | 35                  | 50%, 50%                 | 50                  | 50%, 50%                 |
| May-22 | 0                  | 100%, 0%                 | 23                  | 70%, 30%                 | 35                  | 50%, 50%                 | 40                  | 50%, 60%                 |
| Jun-22 | 0                  | 100%, 0%                 | 23                  | 80%, 20%                 | 35                  | 60%, 40%                 | 40                  | 40%, 50%                 |
| Jul-22 | 0                  | 100%, 0%                 | 23                  | 80%, 20%                 | 23                  | 60%, 40%                 | 23                  | 40%, 40%                 |
| Aug-22 | 0                  | 100%, 0%                 | 20                  | 80%, 20%                 | 20                  | 60%, 40%                 | 20                  | 40%, 40%                 |
| Sep-22 | 0                  | 100%, 0%                 | 23                  | 70%, 30%                 | 23                  | 50%, 50%                 | 23                  | 50%, 30%                 |
| Oct-22 | 0                  | 100%, 0%                 | 23                  | 70%, 30%                 | 35                  | 50%, 50%                 | 40                  | 50%, 30%                 |
| Nov-22 | 0                  | 100%, 0%                 | 23                  | 70%, 30%                 | 40                  | 50%, 50%                 | 50                  | 50%, 40%                 |
| Dec-22 | 0                  | 100%, 0%                 | 25                  | 60%, 40%                 | 40                  | 40%, 60%                 | 60                  | 60%, 50%                 |

**Notes: Appt. Type:** Appointment type, **F2F:** Face-to-face, **SI:** Stringency Index.
